# Supplementary material for: Mindray CL-900i Assay: An Effective assay for HBsAg Screening with Superior Specificity
Source: Research Square preprint supplement (doi:10.21203/rs.3.rs-4816153/v1), 2024-08-23
Supplement: Supplementary file 1 [file 5ed8d94993578751df414530.docx]

**Table S1.** A comprehensive summary of the distinctive attributes of the two analyzers.

| Marker | Analyzer | Manufacturer | Assay principle | Throughput | Solid phase | Labeled substance | Sample volume (uL) | Cut off value |
| --- | --- | --- | --- | --- | --- | --- | --- | --- |
| **HBsAg** | Mindray CL-900i | Shenzhen Mindray Bio-Medical Electronics Co., Ltd. | CLIA | 180 tests/hour | Paramagnetic microparticles | Not specified | 50uL | Initially reactive: HBsAg concentration ≥0.05 IU/mL  Initially reactive specimen with HBsAg <1.00 IU/mL, must be concentrated at ≥10,000 RCF for 10 minutes, and then retested in duplication.  Non-reactive: HBsAg concentration <0.05 IU/mL |
| **HBsAg** | Abbott ARCHITECT® i4000SR | Abbott Diagnostics Abbott Park, Illinois, U.S.A | CMIA | 400 tests/hour | Paramagnetic microparticles | Acridinium | 150uL | Reactive: conc. ≥0.05 IU/mL  Non-reactive: conc. <0.05 IU/mL |
| **Confirmatory HBsAg** | Abbott ARCHITECT® i4000SR | Abbott Diagnostics Abbott Park, Illinois, U.S.A | CMIA | 400 tests/hour | Paramagnetic microparticles | Acridinium | 242uL | Confirmed positive: If the non-neutralized sample's S/CO value is >1.00 and the percent neutralization is greater than 50%.  Negative: If the non-neutralized sample's S/CO value is <1.00 is regarded as frequently reactive and has not been verified to contain HBsAg. |
